# Supplementary material
Source: MDPI journal article supplement (https://www.mdpi.com/2071-1050/14/7/3914)
Supplement: s1 [file s1]

Supplementary figures

*Hypnea corona*

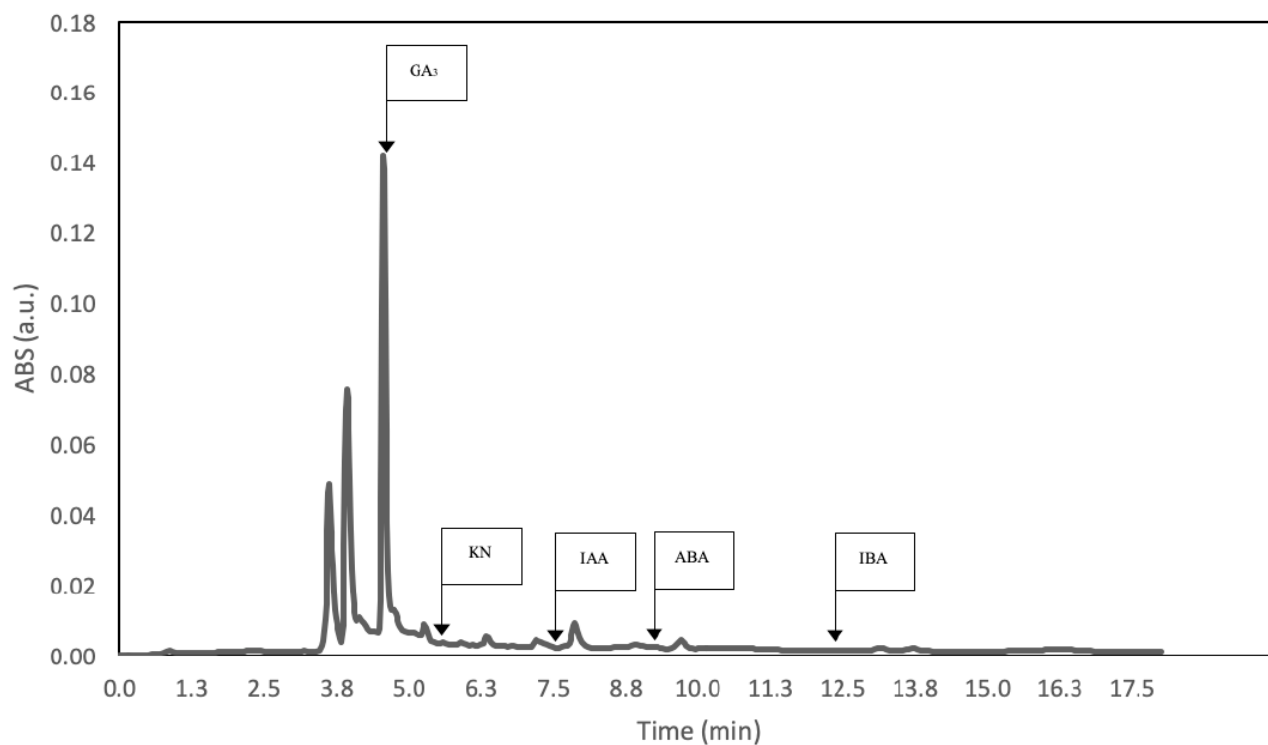

**Figure S1.** *Hypnea corona* Huisman et Petrocelli, HPLC chromatogram. Minutes reported in decimal divisions.

*Spyridia filamentosa*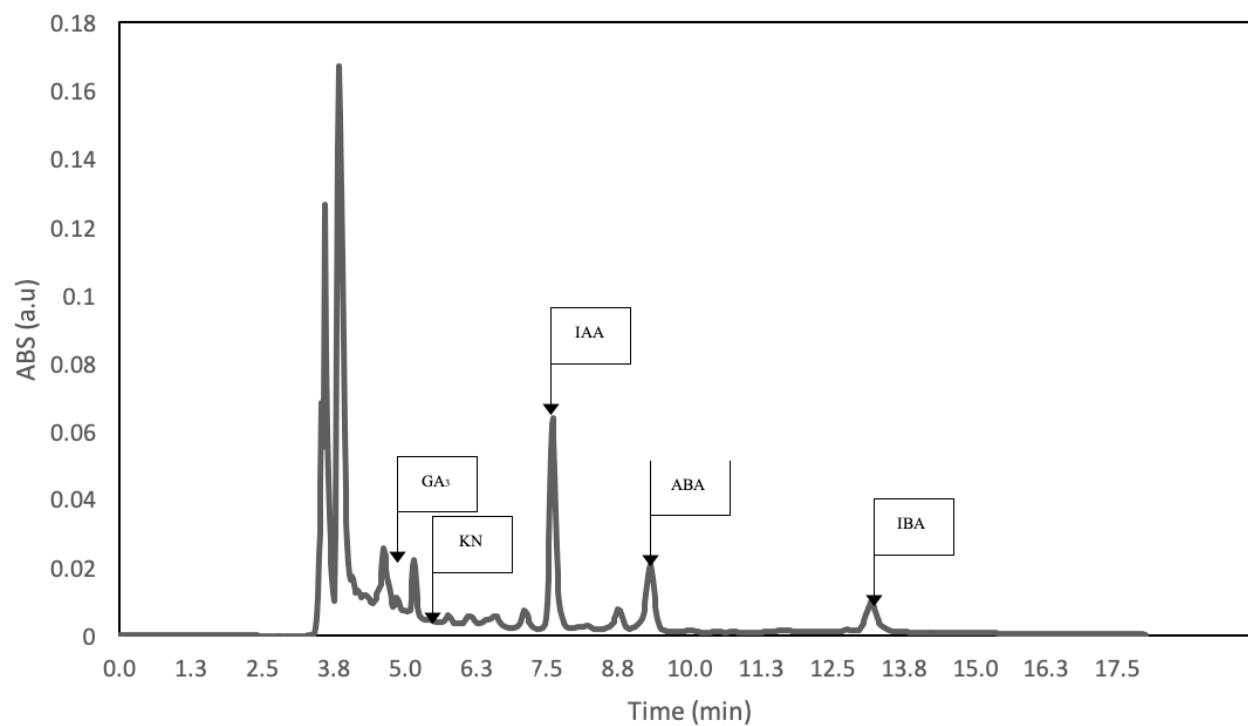

**Figure S2.** *Spyridia filamentosa* (Wulfen) Harvey, HPLC chromatogram. Minutes reported in decimal divisions.

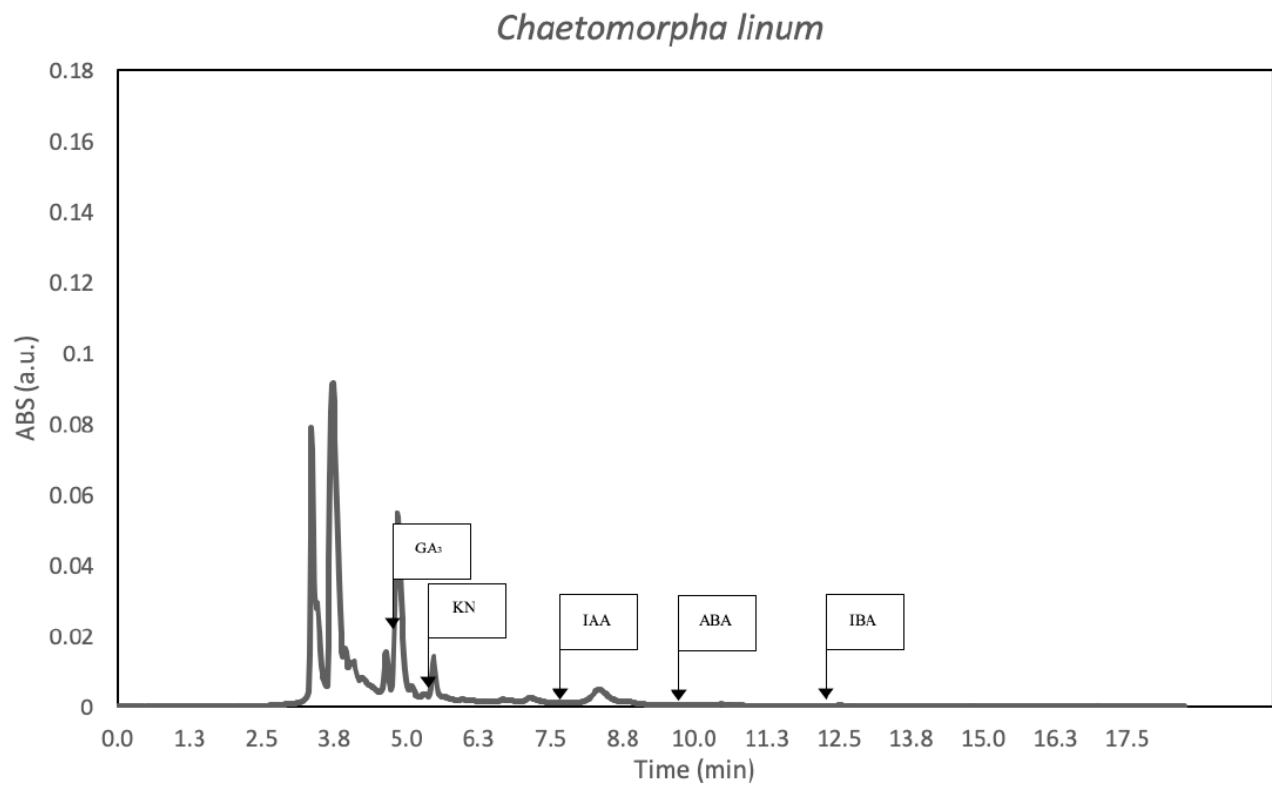

**Figure S3.** *Chaetomorpha linum* (O.F.Müller) Kützing, HPLC chromatogram. Minutes reported in decimal divisions.

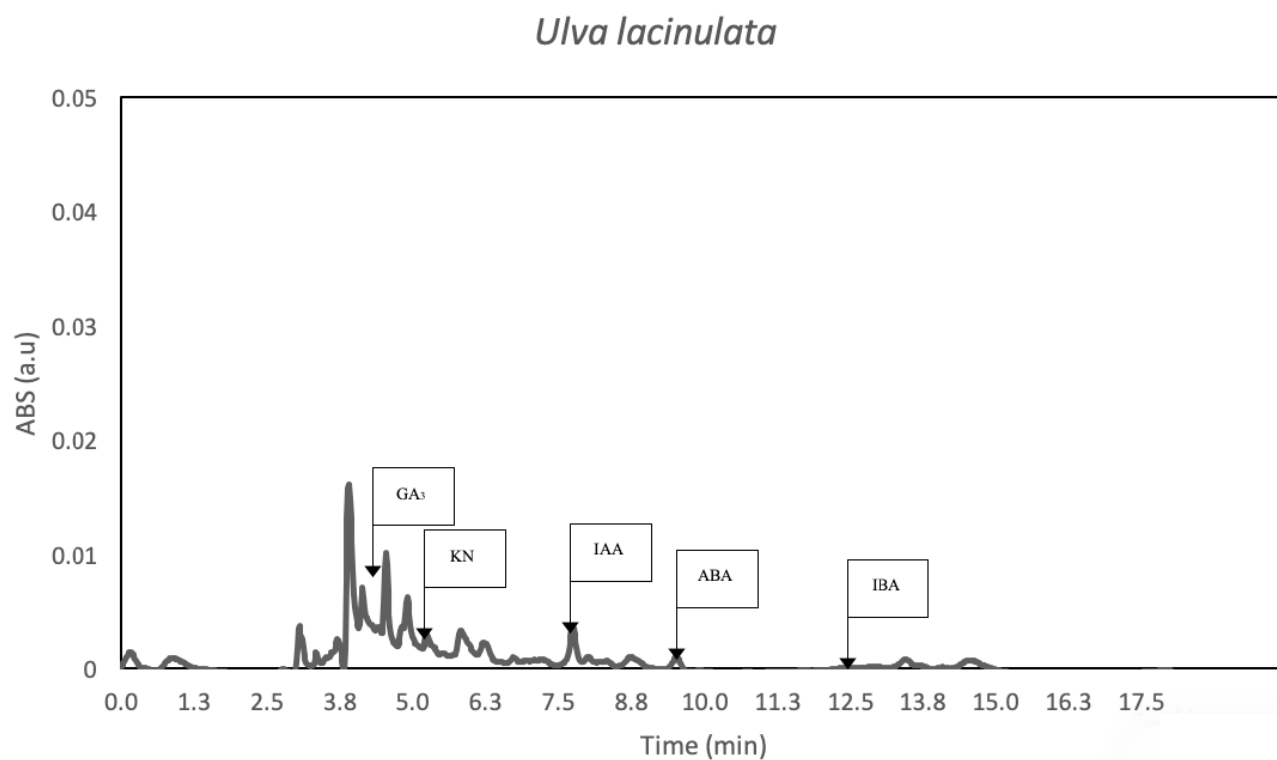

**Figure S4.** *Ulva lacinulata* (Kützinger) Wittrock, HPLC chromatogram. Minutes reported in decimal divisions.
